# Supplementary material for: Photo-coupled electrocatalytic conversion of CO 2 to CO over cobalt phthalocyanine-modified POM-K 8 Ta 6 O 19 Z-scheme photocathodes
Source: Royal Society of Chemistry journal article supplement (doi:10.1039/d5gc04093k), 2025-01-01
Supplement: d5gc04093k1.pdf [file d5gc04093k1.pdf]

## Supplementary Information

### **Photo-coupled electrocatalytic conversion of CO<sub>2</sub>-to-CO over cobalt phthalocyanine modified POM-K<sub>8</sub>Ta<sub>6</sub>O<sub>19</sub> Z-scheme photocathodes**

Chen Liu, Linjie Song, Wanwan Wu, Haiyan Li\*, Dongbin Dang\*, Yan Bai

Henan Key Laboratory of Polyoxometalate Chemistry, Institute of Carbon Neutrality,  
College of Chemistry and Molecular Sciences, Henan University, Kaifeng, 475004,  
China

\*Correspondence: [lihaiyan@henu.edu.cn](mailto:lihaiyan@henu.edu.cn); [dangdb@henu.edu.cn](mailto:dangdb@henu.edu.cn)

## **Experimental procedures**

Cobalt phthalocyanine (CoPc) was purchased from Beijing Innochem Science, Nafion solution (5 wt%) was purchased from Sigma-Aldrich, and while  $\text{KHCO}_3$  and KOH from Kermel.  $\text{Ta}_2\text{O}_5$  (>99.9%) was bought from Aladdin, and ethanol and isopropyl alcohol were bought from Tianjin Fuyu Fine Chemical. All chemicals were used as received, Milli-Q water (18.2 M $\Omega$ ) was obtained from ultrapure water system.

### **Synthesis of Lindqvist type $\text{K}_8\text{Ta}_6\text{O}_{19} \bullet 17\text{H}_2\text{O}$**

The synthesis was performed following a literature method with modifications.<sup>1</sup> Typically,  $\text{Ta}_2\text{O}_5$  (10 g) was gradually slowly added to a melt of 40 g KOH pellets (85% purity) in a nickel crucible. After heating for 30 min, the melt is cooled to room temperature. Subsequently, 100 mL of high purity water was heated to boiling for degassing, and the cooled melt was dissolved in 100 mL of degassed water. Following, the mixture was filtered through a sand core funnel and the filtrate was concentrated to approximately 25 mL by heating. After keeping at 0° C for 12 h, the resulting crystals were collected by filtration through a sand core funnel, sequentially washed with 1:1 (V/V) ethanol-water mixture and anhydrous ethanol, and finally dried under vacuum.

### **Synthesis of CoT- $x$ Z-scheme heterojunction**

$\text{K}_8\text{Ta}_6\text{O}_{19}$  was dispersed in a solution containing anhydrous ethanol and 0.025 g of commercial cobalt phthalocyanine. After severally stirring and sonication for two hours, the anhydrous ethanol was evaporated at 95 °C to obtain a blue solid. Subsequently, the obtained sample was further stabilized at 300 °C for 2 h to form CoPc/ $\text{K}_8\text{Ta}_6\text{O}_{19}$ , designated as CoT- $x$ , where  $x$  is the mass ratio percentage of  $\text{K}_8\text{Ta}_6\text{O}_{19}$  to CoPc.

### **Fabrication of CoT- $x$ Z-scheme heterojunction photocathodes**

A mixture of 8 mg of catalyst, 3.5 mg of carbon black, 240  $\mu\text{L}$  of high purity water, 240  $\mu\text{L}$  of isopropanol and 160  $\mu\text{L}$  of 5% Nafion solution was prepared as a catalyst suspension. The prepared slurry was sonicated for 2 h and then drop-cast uniformly onto hydrophobic carbon paper within a defined area of  $1 \times 2\text{cm}^2$ . The carbon paper coated catalyst, where the amount of the catalyst loaded was controlled to be

approximately  $0.35 \text{ mg cm}^{-2}$ , was then dried overnight in a vacuum oven at  $60^{\circ}\text{C}$ .

### **Photoelectrochemical and $\text{CO}_2$ reduction properties measurements**

The photoelectrochemical/electrochemical tests of all the photocathodes were performed on an electrochemical workstation (CHI760E) by a H-cell (separated from a Nafion D-115 cation exchange membrane) using a three-electrode system of  $\text{CoT-}x|\text{Ag}/\text{AgCl}|\text{Pt}$ , where Pt sheet and  $\text{Ag}/\text{AgCl}$  were used as counter and reference electrodes, respectively, and the as-fabricated  $\text{CoT-}x$  catalysts coated on carbon paper were used as working electrode. A 300 W xenon lamp served as a light source in this study. The light intensity was set at approximately  $16 \text{ mW}/\text{cm}^2$  and xenon lamp positioned 20 cm from the reaction window. All potentials were calibrated by the Nernst equation to the reversible hydrogen electrode (RHE) reference scale using  $E_{\text{RHE}} = E_{\text{Ag}/\text{AgCl}} + 0.059 \times \text{pH} + 0.197$ .  $0.5 \text{ M KHCO}_3$  was used as the electrolyte solution for the photoelectrocatalytic  $\text{CO}_2$  reduction measures, and it needed to be purged with high-purity  $\text{CO}_2$  (99.99 %) gas for at least 30 min before the test to reach saturation. After  $\text{CO}_2$  saturation, a pH value of 7.2 can be obtained for the electrolyte. The achieved gaseous products at each fixed potential were analyzed using gas chromatography (Panna A91 Plus GC) equipped with a flame ionization detector (FID) and a thermal conductivity detector (TCD). High-purity argon gas (Ar, 99.99 %) was used as the carrier gas. During the measures, the flow rate of the  $\text{CO}_2$  gas was controlled by a Sevenstar D07—7 mass flow controller to be 14 standard cubic centimeters per minute (sccm). Scan activation was performed at a scan rate of  $0.05 \text{ V s}^{-1}$  for 20 cycles of cyclic voltammetry (CV). Liquid products were analyzed by  $^1\text{H}$  NMR (Bruker, Switzerland).

### **Catalysts characterization**

The crystalline structures of all catalysts were identified by X-ray diffraction (XRD, Bruker D8 advance diffractometer, Germany) using  $\text{Cu K}\alpha$  radiation ( $\lambda = 0.15406 \text{ nm}$ ). The morphology of the samples was observed by a field emission scanning electron microscope (FESEM, JSM-7610F, Japan) and a high-resolution transmission electron microscope (HRTEM, FEI Tecnai G2 F20, America).  $^1\text{H}$  NMR spectra were recorded

on an ASCEND 500 BRUKER with D<sub>2</sub>O as the solvent at room temperature. Chemical shifts are reported in ppm, and coupling constants are given in Hz. X-ray photoelectron spectroscopy (XPS) measurements were performed using an ESCALAB 250 Xi spectrometer (USA) with Al-K $\alpha$  radiation to analyze the surface electronic states of the catalysts, here, the samples were prepared by pelletizing the powder. The XPS survey spectrum and fine spectrum were detected using a pass energy of 100 eV and 30 eV, respectively. The detection pressure is  $8 \times 10^{-10}$  mBar. The binding energy was calibrated by referencing the C 1s peak at 284.8 eV as the reference. The UV-vis diffuse reflectance spectroscopy of the catalysts were determined with BaSO<sub>4</sub> as the reference at room temperature by using a UV-vis spectrophotometer (Agilent Cary 5000, USA). Inductively coupled plasma optical emission spectroscopy (ICP-OES, America Agilent 5110) was used to analyze the element composition of the sample quantitatively. The photoluminescence spectra (PL) measurements were carried out on a spectrophotometer (F7000, Japan) with an excitation wavelength of 430 nm. The electron paramagnetic resonance (EPR) signal of oxygen vacancy was recorded by Bruker 300 EPR spectrometer at 77 K. The Fourier transform infrared spectra (FT-IR, Spectrum Two, America) of the samples were recorded from 400 to 4000 cm<sup>-1</sup> using KBr pellets in a spectrometer. In situ attenuated total reflectance FTIR (ATR-FTIR) were employed to gain a better insight into the PEC CO<sub>2</sub> reaction mechanism on a Thermo Nicolet 8700 spectrometer equipped with an MCT detector. Chemical deposition of Au thin film (~60 nm) on the Si prism was prepared according to a “two-step wet process”. The catalyst suspensions were dropped on the Au/Si surface as the working electrode. The mass loading of the catalyst was 0.35 mg cm<sup>-2</sup>, and the electrolyte was 0.5 M KHCO<sub>3</sub>. In situ FT-IR spectra were recorded during the stepping of the working electrode potential. Raman spectra were recorded on a laser micro Raman spectrometer (British Renishaw inVia).

**Faradaic efficiency (FE)<sup>2</sup>**

$$FE(CO) = \frac{N_f}{N_{total}} = \frac{x_0 \times N_A \times n \times P \times v \times 1.602 \times 10^{-19}}{I_0 \times R \times T} \times 100\%$$

$N_f$ : Number of electrons required to produce f

$N_{total}$ : Total number of electrons for CO<sub>2</sub> reduction

$x_0$ : Where  $x_0$  is the concentration (ppm) of the achieved product f

$N_A$ : Avogadro constant,  $6.02 \times 10^{23}$

n: number of transferred electrons (for H<sub>2</sub> and CO, n=2)

$v$ : the flow rate of the CO<sub>2</sub> gas

$I_0$ : current at injecting moment

R: Molar gas constant, 8.314 J/ mol× K

**TOF calculations. The TOF was calculated through the following equation<sup>3</sup>**

$$TOF(h^{-1}) = \frac{I_{product}/nF}{\alpha \times m_{cat}/M_{metal}} \times 3600$$

$I_{product}$ : partial current density for CO

n: number of electrons transferred for CO<sub>2</sub> to CO, 2

F: Faradaic constant, 96485 C/mol

$m_{cat}$ : catalyst mass in the electrode

$\alpha$ : mass ratio of active atoms in the catalyst

$M_{metal}$ : atomic mass of metal

**Kubelka-Munk functio:<sup>4</sup>**

$$(\alpha h\nu)^2 = A(h\nu - E_g)$$

$\alpha$ : absorption coefficient

$h$ : Planck's constant

$\nu$ : optical frequency

A: constant

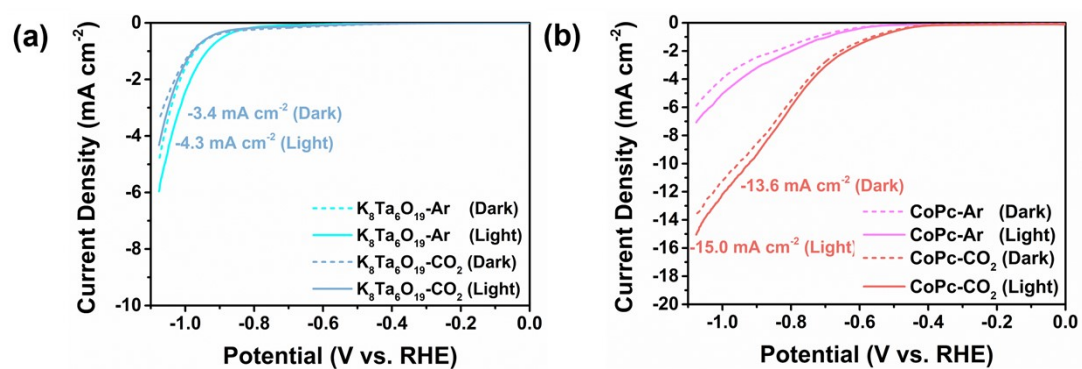

**Fig. S1** LSV curves of (a) CoPc, (b)  $\text{K}_8\text{Ta}_6\text{O}_{19}$ . The dotted lines represent the condition without light (EC) and the solid lines represent the condition with light (PEC).

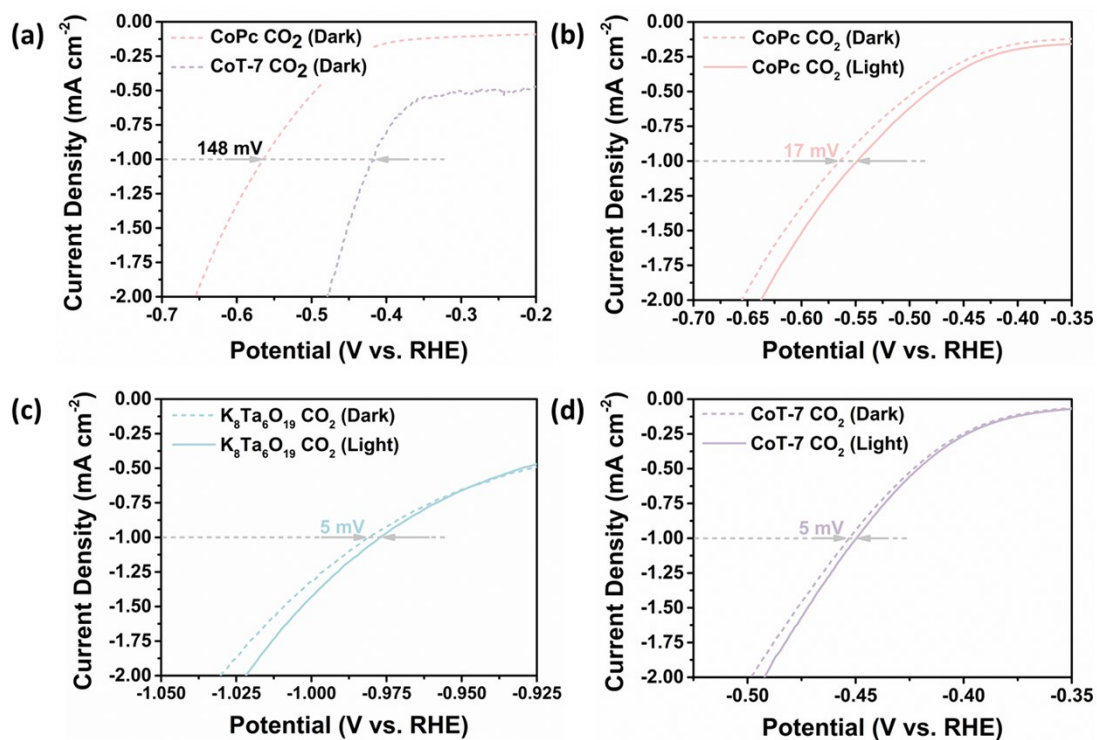

**Fig. S2** (a) CoPc and CoT-7 heterogeneous change of the onset potential ( $1 \text{ mA cm}^{-2}$ ) in  $\text{CO}_2$ -saturated  $0.5 \text{ M KHCO}_3$ ; LSV curves of (b)  $\text{K}_8\text{Ta}_6\text{O}_{19}$ , (c) CoPc, and (d) CoT-7 heterogeneous. The change of the onset potential ( $1 \text{ mA cm}^{-2}$ ) after illumination in  $\text{CO}_2$ -saturated  $0.5 \text{ M KHCO}_3$ .

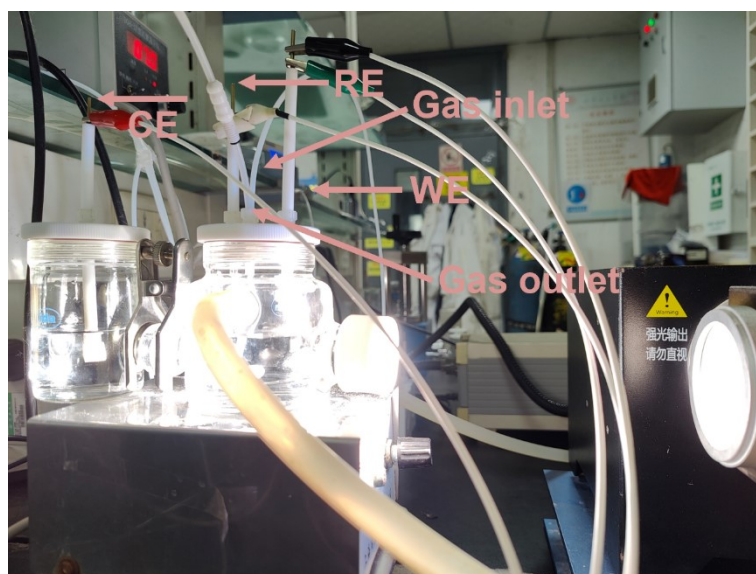

**Fig. S3** H-type electrolytic cell used for photoelectrocatalytic CO<sub>2</sub> reduction.



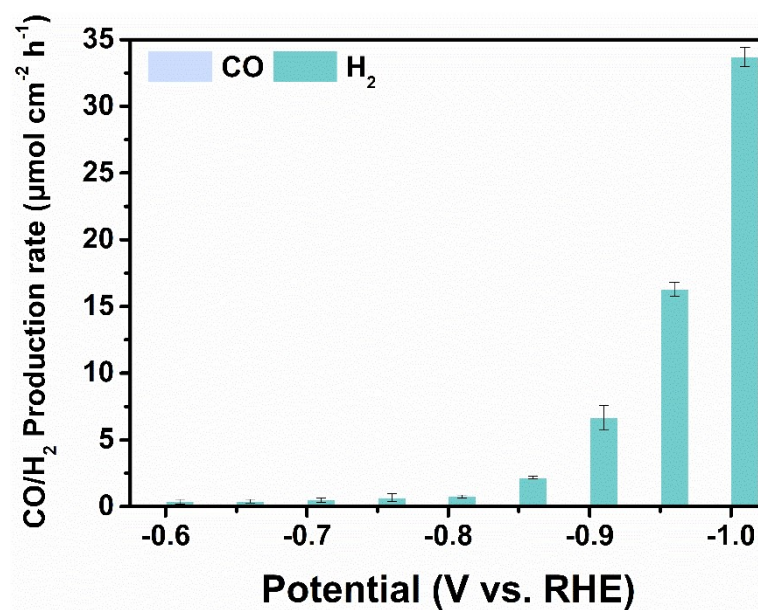

**Fig. S4** CO/H<sub>2</sub> production rate of K<sub>8</sub>Ta<sub>6</sub>O<sub>19</sub>.

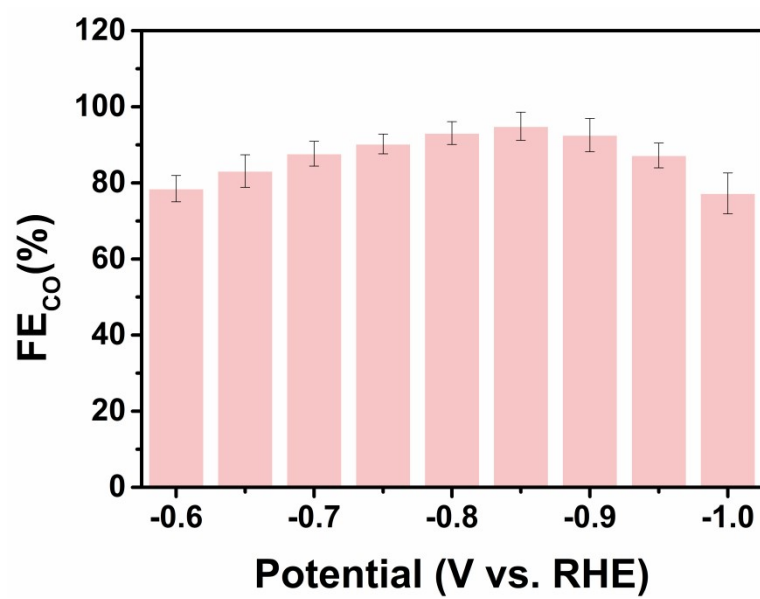

**Fig. S5** CO Faraday efficiency over CoPc under illumination.

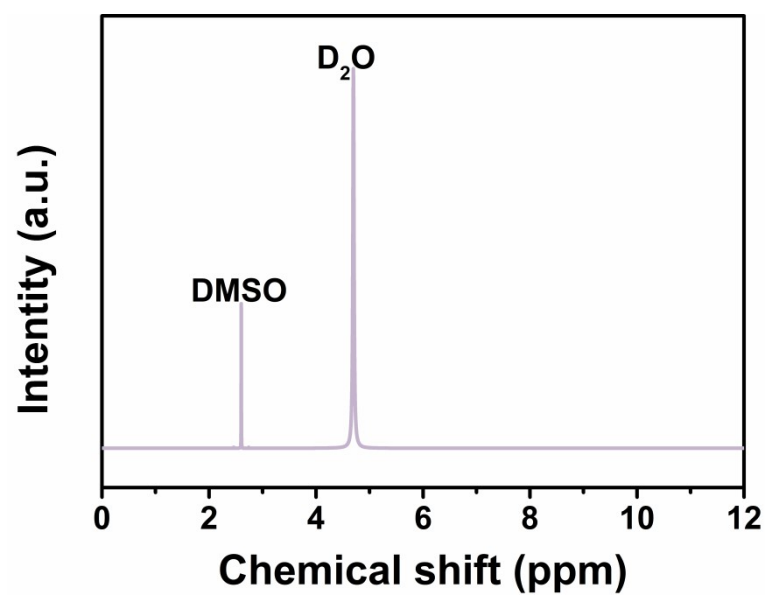

Fig. S6  $^1\text{H}$  NMR singlets of  $\text{CO}_2$  reduction on CoT-7 catalyst.

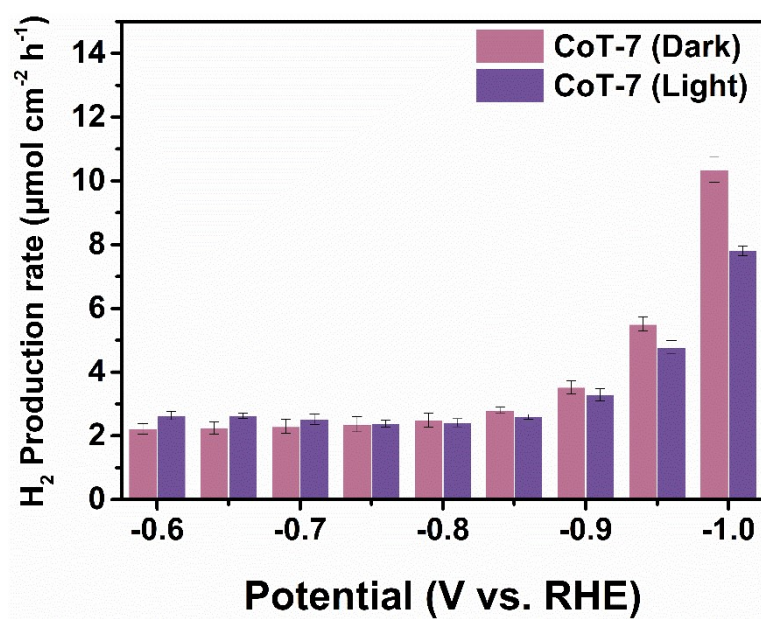

**Fig. S7** H<sub>2</sub> production rates of CoT-7 under dark and light conditions in CO<sub>2</sub> atmosphere.

**Table S1.** Different Co atom loadings on CoT-7 heterojunction and CoPc.

| Photo-copled electrocatalysts | Co atom loading (%) |
|-------------------------------|---------------------|
| CoPc                          | 10.07               |
| CoT-7 heterojunction          | 1.2                 |

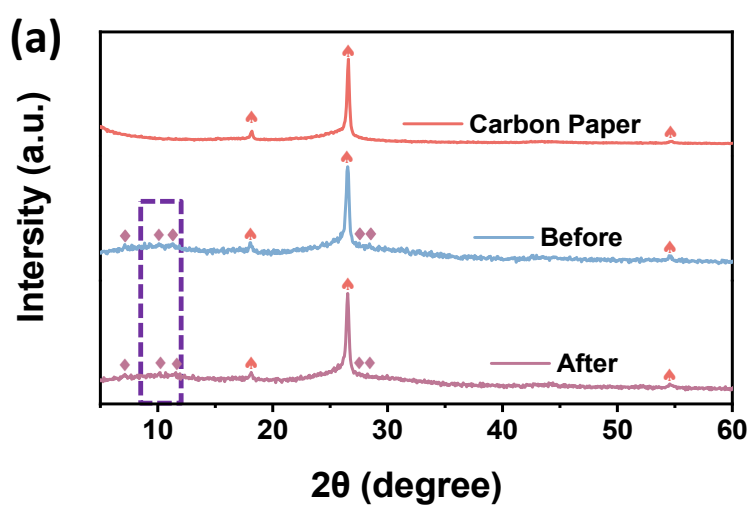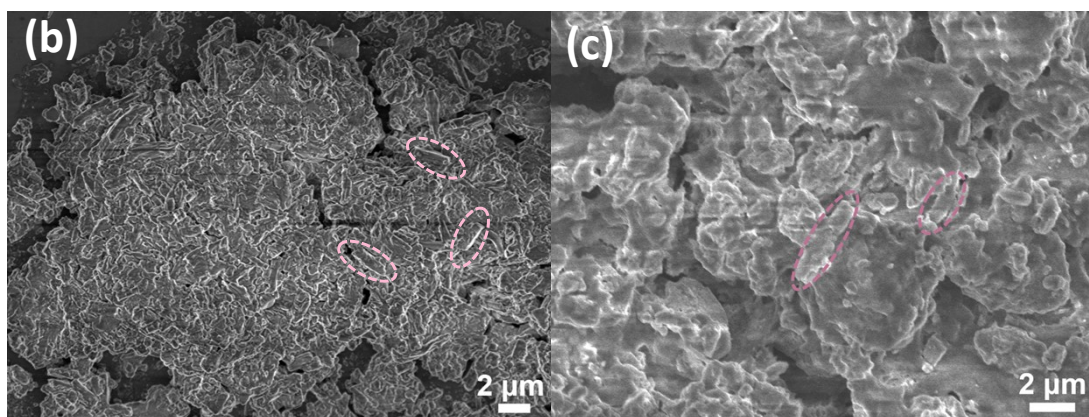

**Fig. S8** (a) XRD patterns of CoT-7 coated on the carbon paper before and after reaction (♦: CoT-7, ♠: Carbon Paper); (b) (c) FESEM images of CoT-7 before and after reaction.

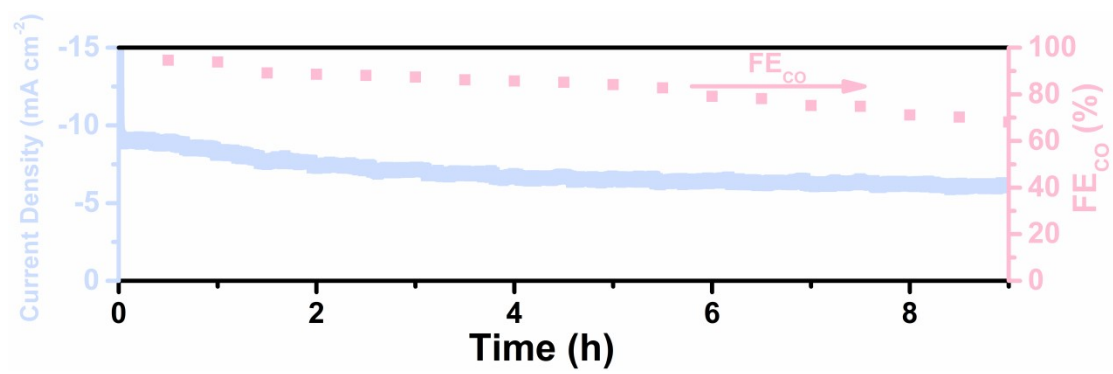

**Fig. S9** Stability test chart of CoPc.

**Table S2.** CO<sub>2</sub>RR performance comparison of CoT-7 heterojunction with other reported catalysts in aqueous solution.

| <b>Catalysts</b>                                                               | <b>Potential<br/>(V vs.<br/>RHE)</b> | <b><math>j_{\text{CO}}</math><br/>(mA cm<sup>-2</sup>)</b> | <b>FE<sub>CO</sub> (%)</b> | <b>Reference</b>     |
|--------------------------------------------------------------------------------|--------------------------------------|------------------------------------------------------------|----------------------------|----------------------|
| <b>CoT-7<br/>heterojunction (Light)</b>                                        | <b>-0.9</b>                          | <b>25.8</b>                                                | <b>99.56</b>               | <b>This<br/>work</b> |
| <b>CoT-7<br/>heterojunction (Dark)</b>                                         | <b>-0.9</b>                          | <b>24.6</b>                                                | <b>98.1</b>                | <b>This<br/>work</b> |
| <b>Cu<sub>SA</sub>@AHPC</b>                                                    | -0.6                                 | 3.48                                                       | 96.1%                      | 5                    |
| <b>Zn@ZnO-T</b>                                                                | - 1.2                                | 12.75                                                      | 92.1%                      | 6                    |
| <b>MXene@Por-COF-<br/>Co-7</b>                                                 | -0.6                                 | 9.33                                                       | 97.28                      | 7                    |
| <b>CNT-UrFe</b>                                                                | -0.78                                | 1.62                                                       | 99.9                       | 8                    |
| <b>Se-CN<sub>s</sub></b>                                                       | -0.6                                 | 9.1                                                        | 90%                        | 9                    |
| <b>CoPc-PI-COF-1</b>                                                           | -0.90                                | 21.2                                                       | 95                         | 10                   |
| <b>SnSe<sub>2</sub>-graphene<br/>nanosheets</b>                                | -0.9                                 | 11.8                                                       | 95.1%                      | 11                   |
| <b>Cu-In<sub>2</sub>O<sub>3</sub>/C</b>                                        | -0.48                                | 0.55                                                       | 86.7%                      | 12                   |
| <b>Crumpled Pd(100)<br/>surface</b>                                            | -0.59                                | 6.6                                                        | 93%                        | 13                   |
| <b>GaN (Light)</b>                                                             | 0.17                                 | 18                                                         | 65                         | 14                   |
| <b>Cu<sub>2</sub>O/Ga<sub>2</sub>O<sub>3</sub>/TiO<sub>2</sub><br/>(Light)</b> | 0.44                                 | 1.18                                                       | 22.67                      | 15                   |
| <b>Co-qPyH/TiO<sub>2</sub>/CIGS<br/>(Light)</b>                                | 0.2                                  | 3.0                                                        | 89                         | 16                   |
| <b>Au<sub>3</sub>Cu NPs/Si NW<br/>(Light)</b>                                  | -0.2                                 | 2.2                                                        | 80                         | 17                   |
| <b>nanoporous Au mesh</b>                                                      | -0.03                                | 2.94                                                       | 91                         | 18                   |



---

|                                   |       |      |      |    |
|-----------------------------------|-------|------|------|----|
| <b>on Si (Light)</b>              |       |      |      |    |
| <b>Al-PMOF(Co)</b>                | -0.8  | 4.3  | 90   | 19 |
| <b>(Light)</b>                    |       |      |      |    |
| <b>Zn-CoTAPc/PMo<sub>12</sub></b> | -0.75 | 18.7 | 96.2 | 20 |
| <b>MLSs (Light)</b>               |       |      |      |    |
| <b>CoN-7</b>                      | -0.85 | 16.4 | 98.6 | 21 |
| <b>heterojunction (Light)</b>     |       |      |      |    |

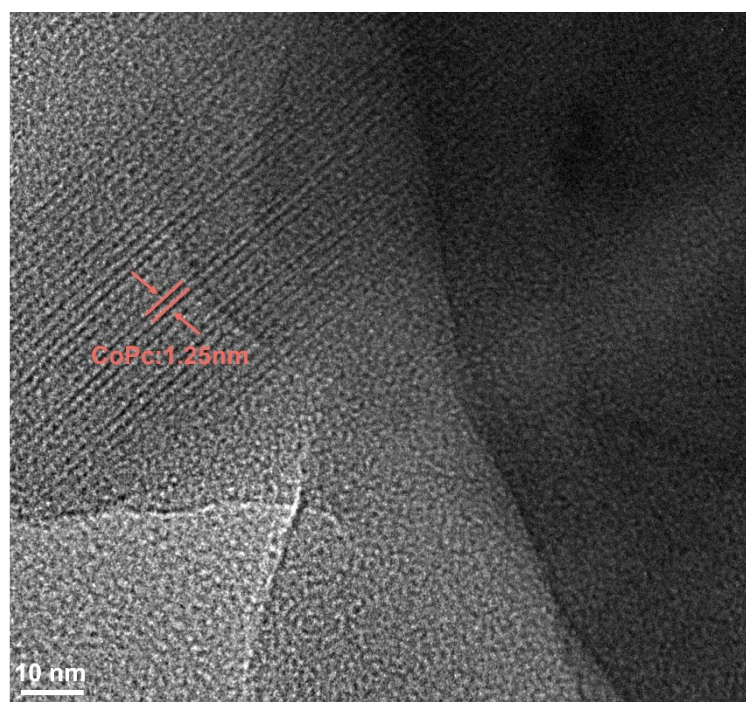

**Fig. S10** High-resolution TEM images of CoPc.

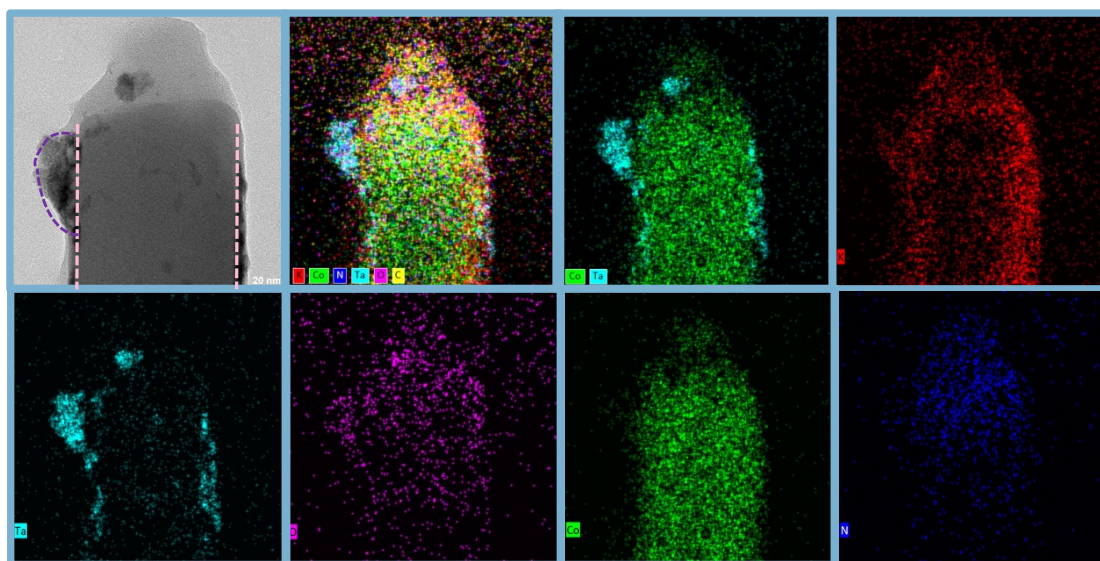

**Fig. S11** High-resolution TEM images and mappings of CoT-7.

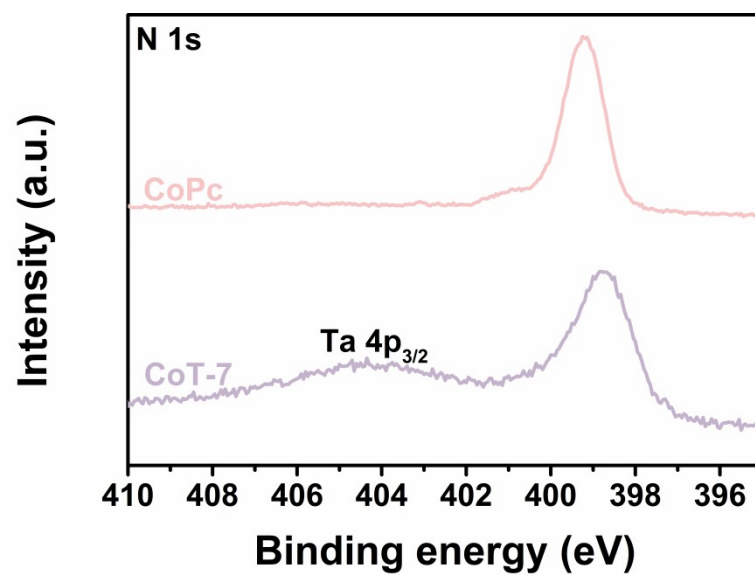

Fig. S12 N 1s high resolution XPS spectra.

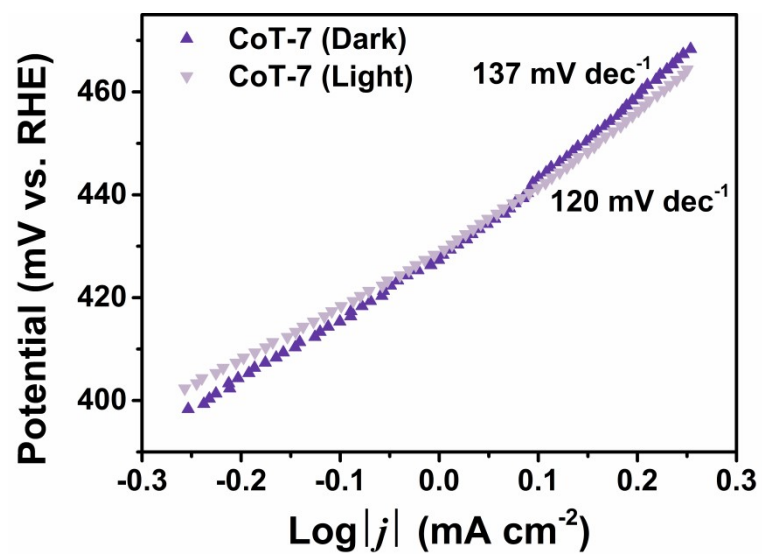

Fig. S13 Tafel slope plots of CoT-7.

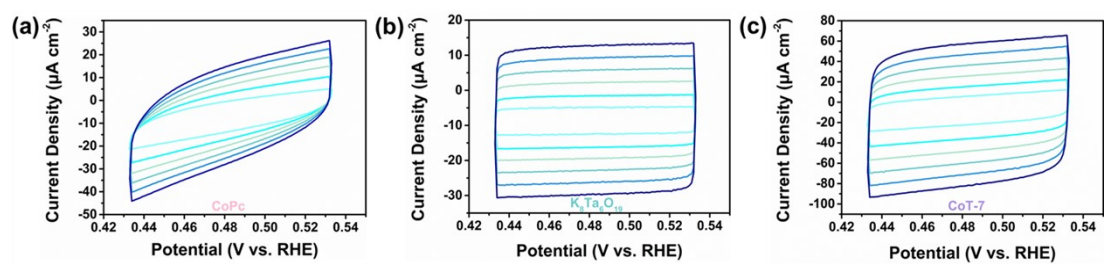

**Fig. S14** Cyclic voltammograms (CV) curves under different scan rates for  $K_8Ta_6O_{19}$ , CoPc, and CoT-7 heterojunction.

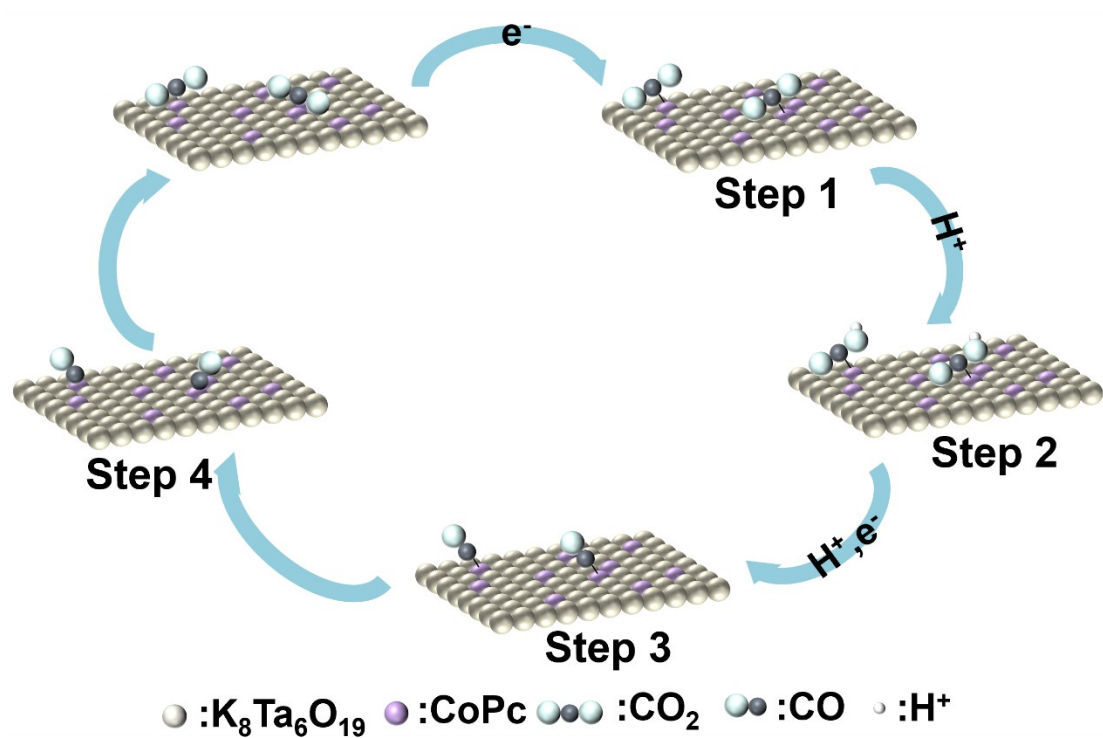

**Fig. S15** The  $CO_2$ -to- $CO$  conversion reactive pathway and intermediate architectures over CoT-7 heterojunction.

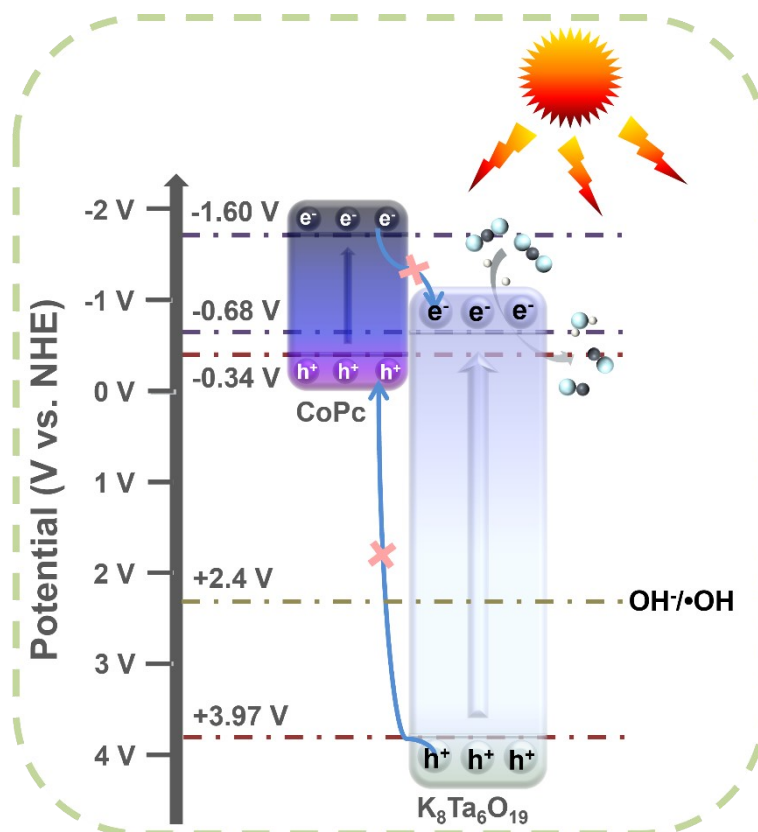

**Fig. S16** Type-II mechanism for PEC reduction of CO<sub>2</sub> into chemical fuels.



## References:

- 1 S. Li, S. Chen, F. Zhang, Z. Li, C. Zhang, G. Cao and B. Zhai, Synthesis and characterization of two polyoxotantalates: A building block and its dimeric. *Inorganic Chemistry Communications*, 2019, **106**, 228–232.
- 2 Q. Zhang, D. Ren, S. Pan, M. Wang, J. Luo, Y. Zhao, M. Grätzel and X. Zhang, Micro-Electrode with Fast Mass Transport for Enhancing Selectivity of Carbonaceous Products in Electrochemical CO<sub>2</sub> Reduction. *Adv Funct Materials*, 2021, **31**, 2103966.
- 3 S. Chen, X. Li, C. Kao, T. Luo, K. Chen, J. Fu, C. Ma, H. Li, M. Li, T. Chan and M. Liu, Unveiling the Proton-Feeding Effect in Sulfur-Doped Fe-N-C Single-Atom Catalyst for Enhanced CO<sub>2</sub> Electroreduction. *Angew Chem Int Ed*, 2022, **61**, e202206233.
- 4 W. Wang, Q. Song, C. Liu, H. Li, Y. Bai and D. Dang, Highly efficient photocatalytic environmental remediation of MET over Z-Co<sub>3</sub>O<sub>4</sub>/K<sub>7</sub>HNb<sub>6</sub>O<sub>19</sub> Z-scheme heterojunction with controllable hierarchical peony flower-like morphology using Co-ZIF-67 as a template. *Applied Surface Science*, 2023, **630**, 157447.
- 5 C. Wang, K. Zhang, X. Zhang, J. Wang, X. Luo, G. Li and K. Wang, Zwitterionic polymer-assisted asymmetrically coordinated Cu atoms on aligned carbonous microchannels for efficient electroreduction of CO<sub>2</sub> to CO†. *Green Chem.*, 2025, **27**, 5236–5245.
- 6 X. Liu, J. Ge, S. Li, H. Yang, H. Tian, H. Liu, Y. Li, X. Zheng, Y. Tian, X. Cui and Q. Xu, Activating dynamic Zn–ZnO interface with controllable oxygen vacancy in CO<sub>2</sub> electroreduction for boosting CO production†. *Green Chem.*, 2025, **27**, 6133–6144.
- 7 L. Zhou, Q. Tian, X. Shang, Y. Zhao, W. Yao, H. Liu and Q. Xu, Heterostructure construction of covalent organic frameworks/Ti<sub>3</sub>C<sub>2</sub>-MXene for high-efficiency electrocatalytic CO<sub>2</sub> reduction†. *Green Chem.*, 2024, **26**, 1454–1461.
- 8 C. Zhang, D. Dragoë, F. Brisset, B. Boitrel, B. Lassalle-Kaiser, W. Leibl, Z. Halime and A. Aukaaloo, Second-sphere hydrogen-bonding enhances heterogeneous electrocatalytic CO<sub>2</sub> to CO reduction by iron porphyrins in water†. *Green Chem.*,

- 2021, **23**, 8979–8987.
- 9 B. Zhang, J. Zhang, F. Zhang, L. Zheng, G. Mo, B. Han and G. Yang, Selenium-Doped Hierarchically Porous Carbon Nanosheets as an Efficient Metal-Free Electrocatalyst for CO<sub>2</sub> Reduction. *Adv Funct Materials*, 2020, **30**, 1906194.
  - 10 B. Han, X. Ding, B. Yu, H. Wu, W. Zhou, W. Liu, C. Wei, B. Chen, D. Qi, H. Wang, K. Wang, Y. Chen, B. Chen and J. Jiang, Two-Dimensional Covalent Organic Frameworks with Cobalt(II)-Phthalocyanine Sites for Efficient Electrocatalytic Carbon Dioxide Reduction *J. Am. Chem. Soc.*, 2021, **143**, 7104–7113.
  - 11 S. Shao, T. Wen, Z. Wang, X. Yin, Y. Liu, W. Yang and Y. Chen, Fabrication of SnSe<sub>2</sub>-graphene nanosheets for highly effectively electrocatalytic reduction of CO<sub>2</sub>. *Electrochimica Acta*, 2022, **434**, 141331.
  - 12 Y. Ye, Y. Liu, Z. Li, X. Zou, H. Wu and S. Lin, Highly selective and active Cu-In<sub>2</sub>O<sub>3</sub>/C nanocomposite for electrocatalytic reduction of CO<sub>2</sub> to CO. *Journal of Colloid and Interface Science*, 2021, **586**, 528–537.
  - 13 Y. Zhao, X. Tan, W. Yang, C. Jia, X. Chen, W. Ren, S. C. Smith and C. Zhao, Surface Reconstruction of Ultrathin Palladium Nanosheets during Electrocatalytic CO<sub>2</sub> Reduction. *Angew Chem Int Ed*, 2020, **59**, 21493–21498.
  - 14 S. Chu, P. Ou, R. T. Rashid, P. Ghamari, R. Wang, H. N. Tran, S. Zhao, H. Zhang, J. Song and Z. Mi, Decoupling Strategy for Enhanced Syngas Generation from Photoelectrochemical CO<sub>2</sub> Reduction. *iScience*, 2020, **23**, 101390.
  - 15 M. Xia, L. Pan, Y. Liu, J. Gao, J. Li, M. Mensi, K. Sivula, S. M. Zakeeruddin, D. Ren and M. Grätzel, Efficient Cu<sub>2</sub>O Photocathodes for Aqueous Photoelectrochemical CO<sub>2</sub> Reduction to Form at eand Syngas. *J. Am. Chem. Soc.*, 2023, **145**, 27939–27949.
  - 16 P. B. Pati, R. Wang, E. Boutin, S. Diring, S. Jobic, N. Barreau, F. Odobel and M. Robert, Photocathode functionalized with a molecular cobalt catalyst for selective carbon dioxide reduction in water. *Nat Commun*, 2020, **11**, 3499.
  - 17 Q. Kong, D. Kim, C. Liu, Y. Yu, Y. Su, Y. Li and P. Yang, Directed Assembly of Nanoparticle Catalysts on Nanowire Photoelectrodes for Photoelectrochemical CO<sub>2</sub> Reduction. *Nano Lett.*, 2016, **16**, 5675–5680.

- 18 J. T. Song, H. Ryoo, M. Cho, J. Kim, J. Kim, S. Chung and J. Oh, Nanoporous Au Thin Films on Si Photoelectrodes for Selective and Efficient Photoelectrochemical CO<sub>2</sub> Reduction. *Advanced Energy Materials*, 2017, **7**, 1601103.
- 19 K. Wang, Y. Liu, J. Kang, Y. Zhang, Q. Wang, L. Chen, Q. Wang, B. Liu, M. Liu, X. Qiu, W. Li and J. Li, Site-selective photocoupled electrocatalytic CO<sub>2</sub> reduction over efficient Al-oxo chain based-porphyrin framework. *Applied Catalysis B: Environmental*, 2023, **325**, 122315.
- 20 H. Yang, D. Yang, Y. Zhou and X. Wang, Polyoxometalate Interlayered Zinc–Metallophthalocyanine Molecular Layer Sandwich as Photocoupled Electrocatalytic CO<sub>2</sub> Reduction Catalyst. *J. Am. Chem. Soc.*, 2021, **143**, 13721–13730.
- 21 C. Liu, Z. Bian, W. Wang, H. Li, D. Dang and Y. Bai, Photoelectrochemically converting CO<sub>2</sub> over Z-scheme heterojunction CoPc/K<sub>7</sub>HNb<sub>6</sub>O<sub>19</sub> with high Faraday efficiency. *Applied Surface Science*, 2024, **663**, 160192.
